# Supplementary material for: Antibacterial non-woven nanofibers of curcumin acrylate oligomers
Source: Royal Society of Chemistry journal article supplement (doi:10.1039/c4nj01936a), 2015-01-01
Supplement: c4nj01936a1.pdf [file c4nj01936a1.pdf]

### Supplementary Data

## Antibacterial Non-woven Nanofibers of Curcumin Acrylate Oligomers

Naresh Killi, Vejendla Luke Paul, Rathna Venkata Naga Gundloori

Polymer Science and Engineering Division,

CSIR – National Chemical Laboratory, Pune – 411008, India.

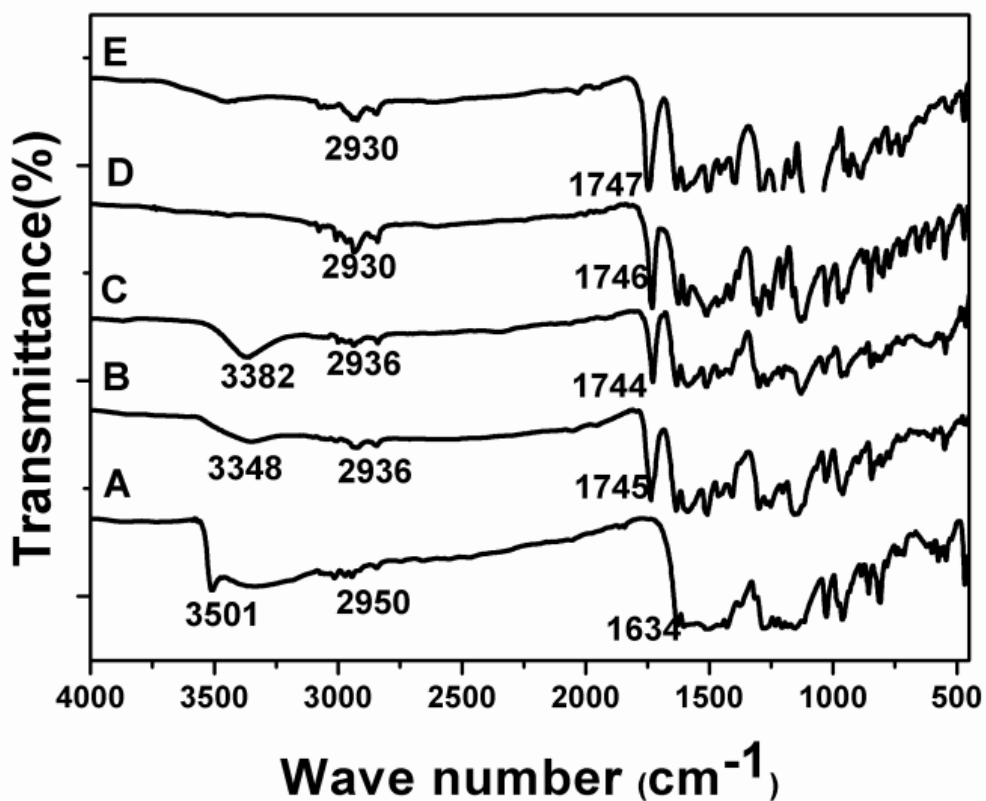

Figure 1S. FT-IR analysis A) CUR B) CmA C) CmMA D) CdiA E) CdiMA.

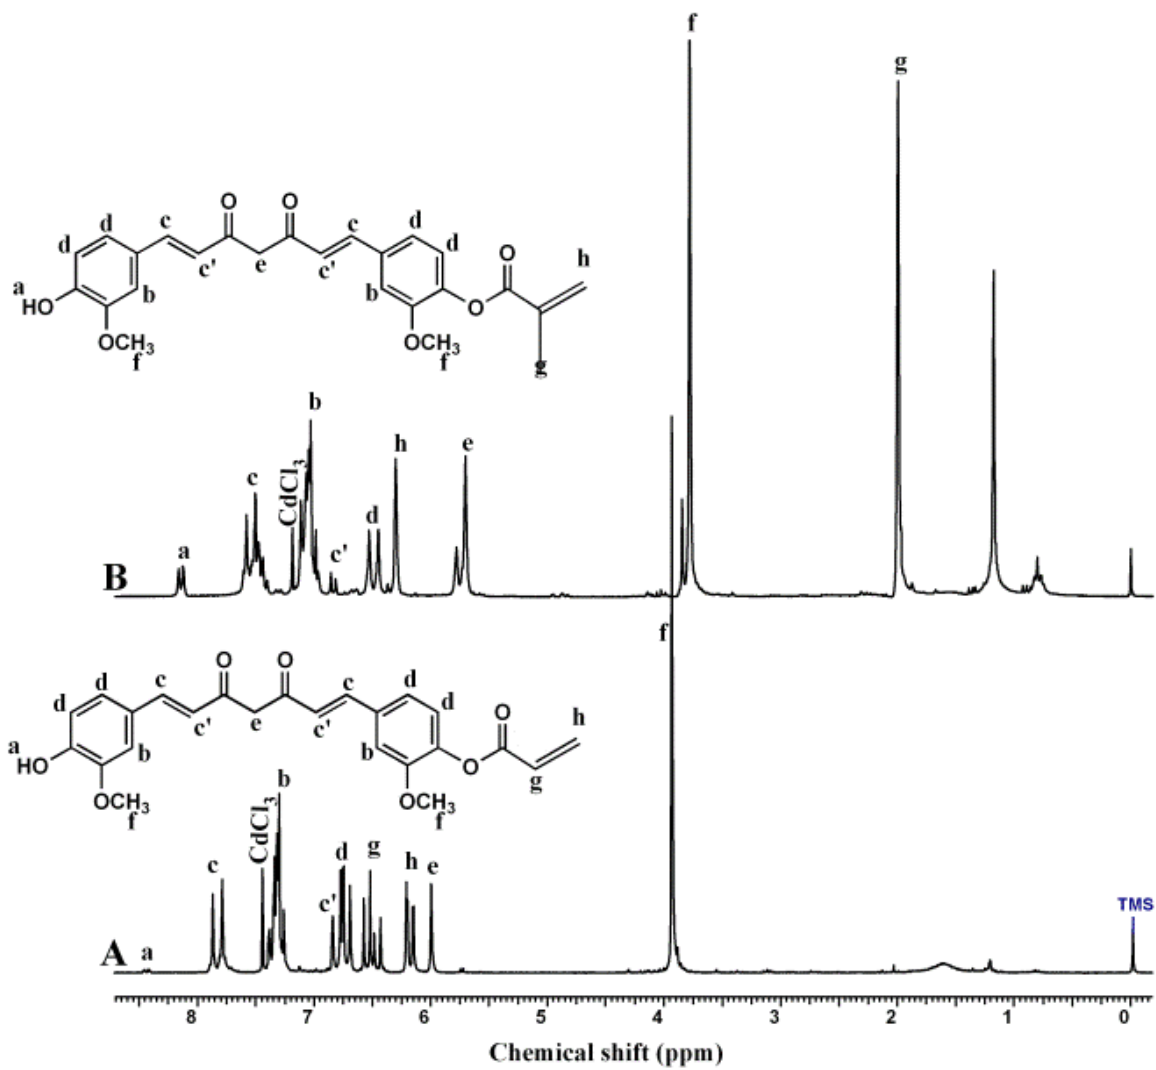

Figure 2S.  $^1\text{H}$  NMR Analysis A) CmA B) CmMA.

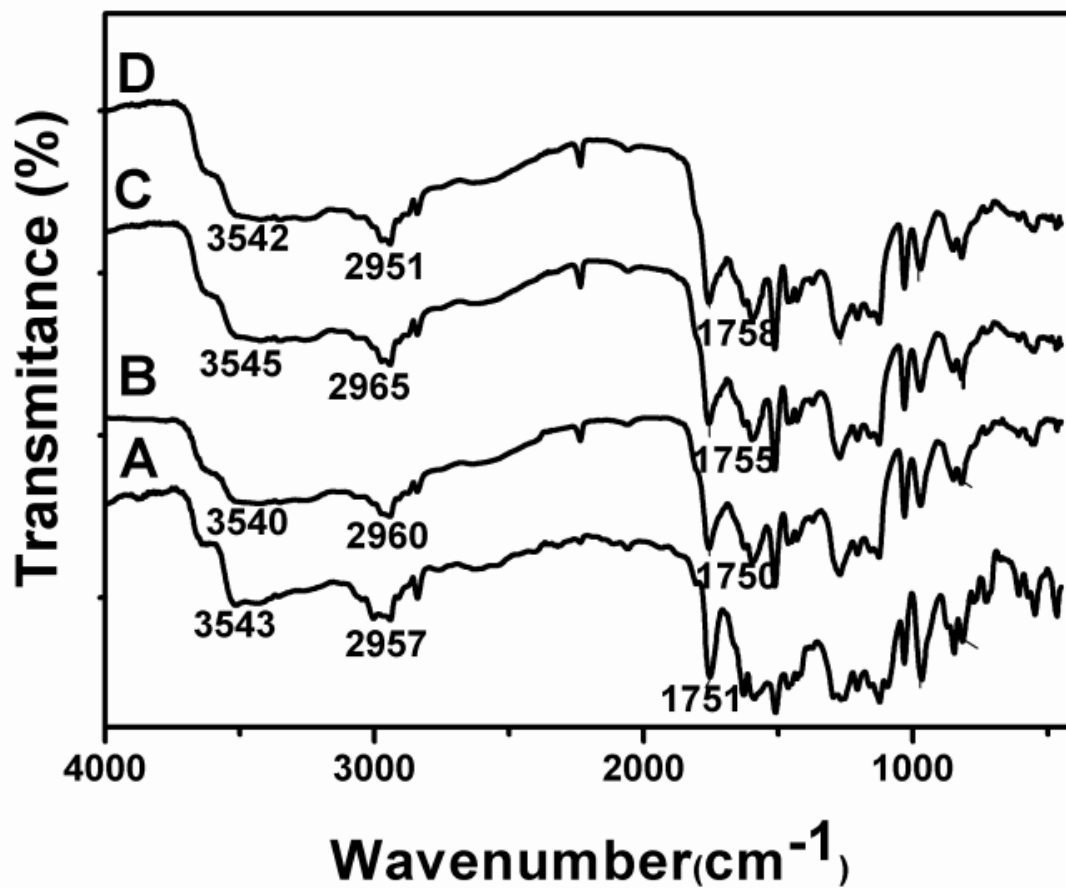

Figure 3S. FT-IR analysis A) OCMA1 B) OCA2 C) OCA1 D) OCMA2.

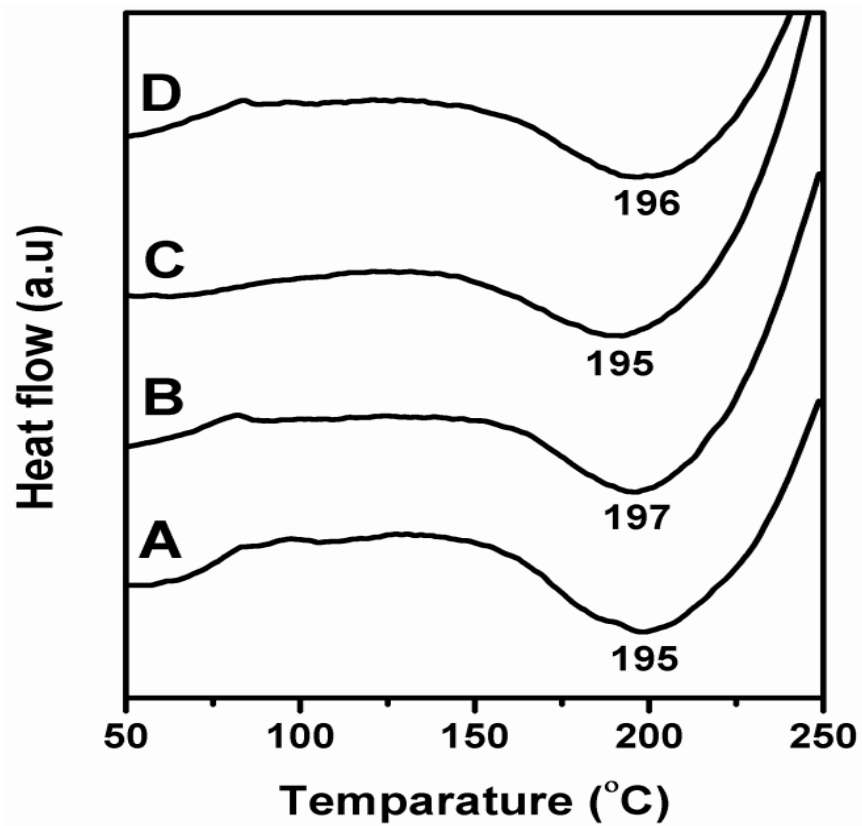

**Figure 4S.** DSC analysis of A) OCMA1 B) OCMA2 C) OCA1 D) OCA2.

**TABLE2S.** Thermo gravimetric analysis (TGA) for OCA and OCMA.

| Compositions | First degradation |        |                                               |                                  |
|--------------|-------------------|--------|-----------------------------------------------|----------------------------------|
|              | Start             | End    | maximum % of<br>Decomposition at end<br>point | Residue at<br>900 <sup>0</sup> C |
| OCMA1        | 233.32            | 432.48 | 60.4                                          | 13.39%                           |
| OCMA2        | 232.13            | 430.93 | 57.2                                          | 18.1%                            |
| OCA1         | 234.04            | 385.02 | 41.75                                         | 17.85%                           |
| OCA2         | 224.14            | 396.61 | 47.94                                         | 21.32%                           |
